# Supplementary material for: Placental Infection Associated with SARS-CoV-2 Wildtype Variant and Variants of Concern
Source: MDPI journal article supplement (doi:10.3390/v15091918), 2023-09-13
Supplement: s1 [file s1]

Supplementary Figure S1:

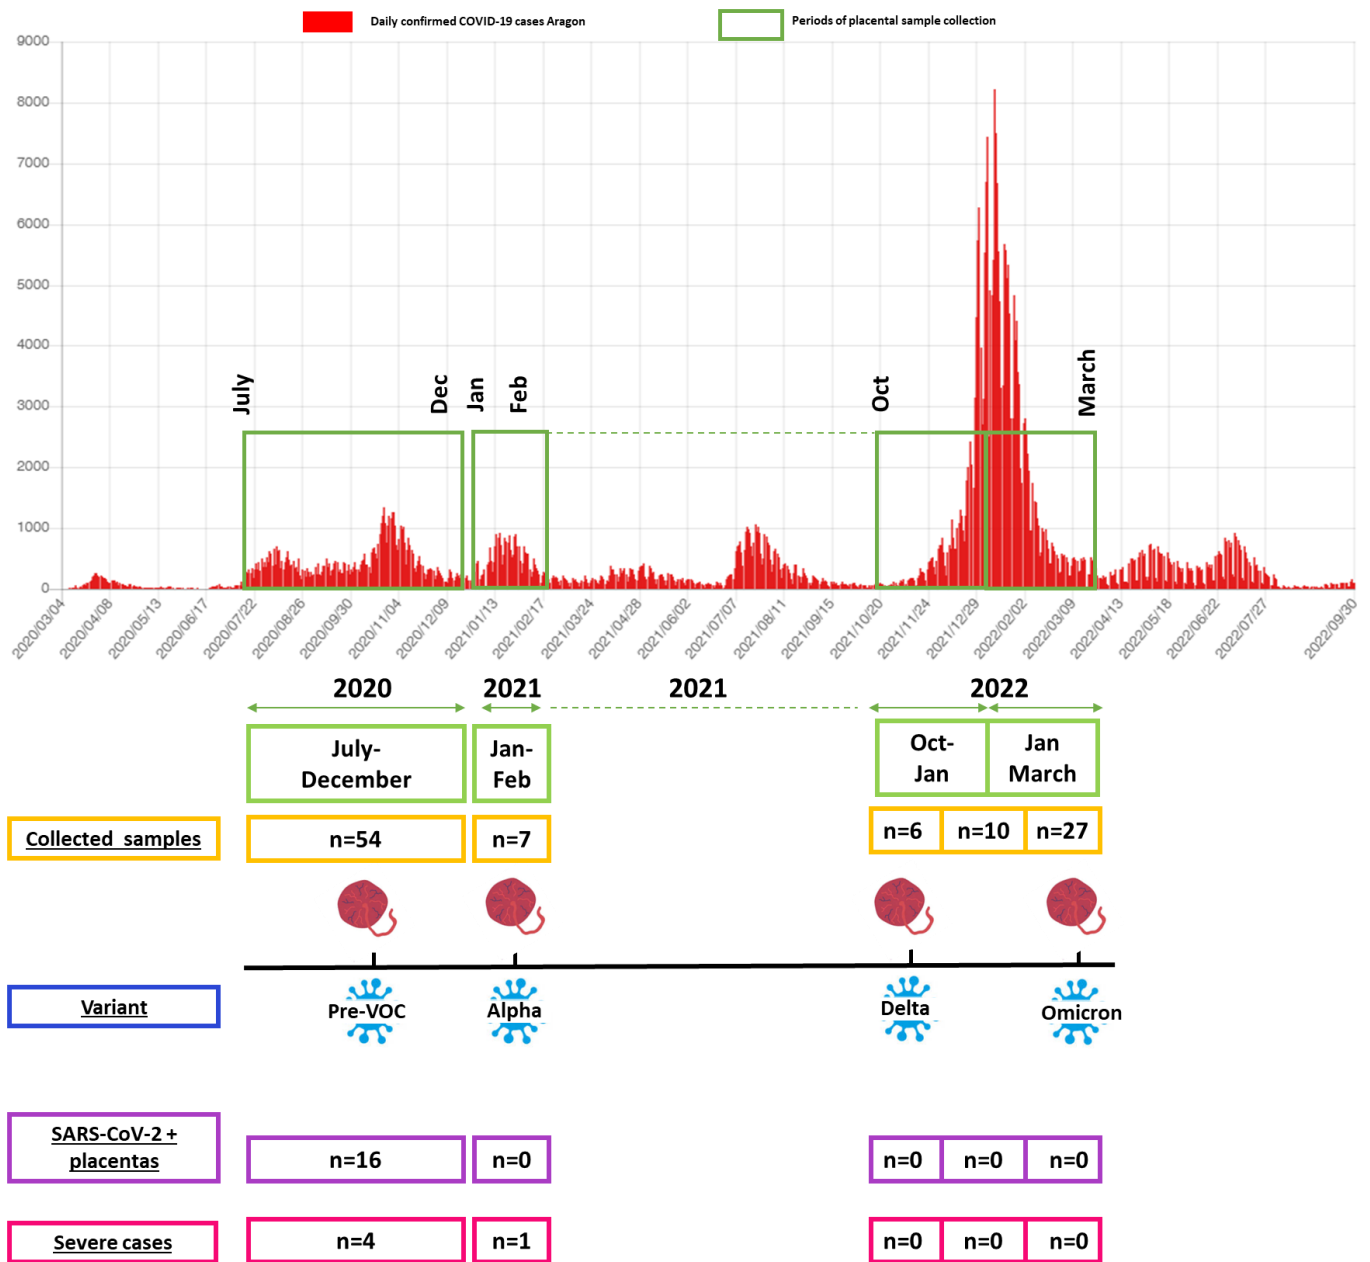

Supplementary Figure S1: Description of the SARS-CoV-2 pandemic in Aragón (Spain) and the placental samples collected in the timeframes indicated.

Supplementary Figure S2:

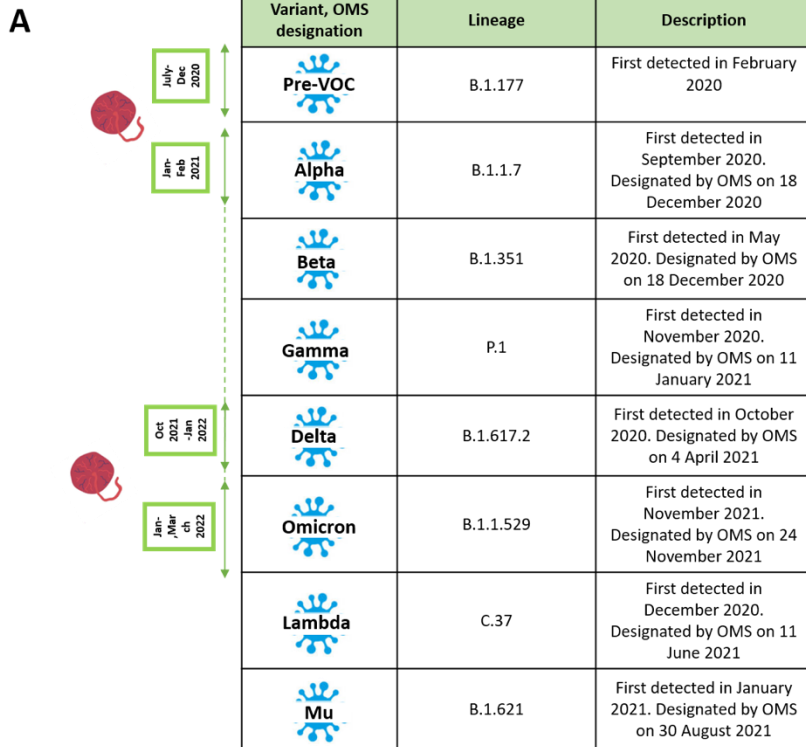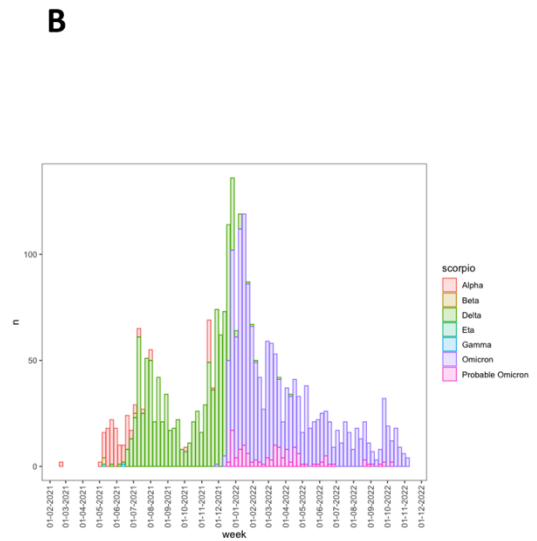

**Supplementary Figure S2:** A) SARS-CoV-2 variants. History of principal designated SARS-CoV-2 variants over time as designated by WHO (<https://www.who.int/activities/tracking-SARS-CoV-2-variants>) during preVOC (March-December 2020) and VOC era (January 2021-present). The period in which samples for this study were taken is indicated on the left. B) The ongoing evolution of variants of concern and interest of SARS-CoV-2 in Aragón, Spain. Number of samples subjected to sequencing to identify the variant/lineage of SARS-CoV-2 by time period (January 2021-present) in our area. Note that the number of samples sequenced to identify the SARS-CoV-2 variant is not representative of the number of infections reported.

Supplementary Figure S3.

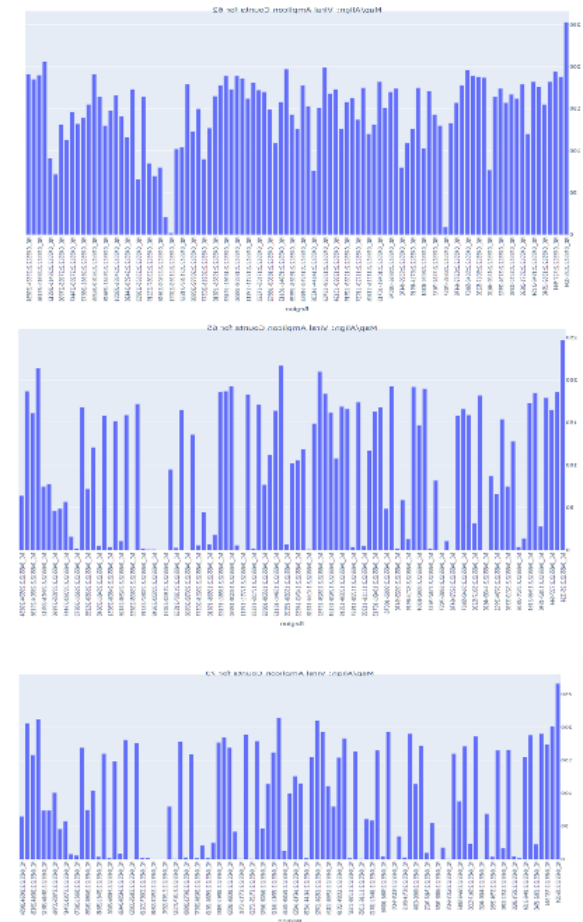

Supplementary Figure S3: Representation of coverage of the SARS-CoV-2 genome obtained by whole genome sequencing. Three representative images are shown.

| FIRST DOSE      |                                | SECOND DOSE    |                                                 | SARS-CoV-2 INFECTION |               |
|-----------------|--------------------------------|----------------|-------------------------------------------------|----------------------|---------------|
| Trimester       | Days after 1 <sup>o</sup> dose | Trimester      | Days between last dose and SARS-CoV-2 diagnosis | SYN                  | PS            |
| 3 <sup>o</sup>  | 21                             | 3 <sup>o</sup> | 61                                              | A                    | Omicron       |
| Preconception   | 21                             | Preconception  | 59                                              | A                    | Delta         |
| 1 <sup>o</sup>  | -                              | -              | 142                                             | A                    | Delta/Omicron |
| 1 <sup>o</sup>  | -                              | -              | 133                                             | A                    | Delta/Omicron |
| 1 <sup>o</sup>  | 21                             | 1 <sup>o</sup> | 235                                             | M                    | Delta/Omicron |
| 2 <sup>o</sup>  | 22                             | 2 <sup>o</sup> | 136                                             | A                    | Delta/Omicron |
| 1 <sup>o</sup>  | 21                             | 1 <sup>o</sup> | 159                                             | M                    | Delta/Omicron |
| 2 <sup>o</sup>  | 28                             | 2 <sup>o</sup> | 100                                             | M                    | Delta/Omicron |
| Preconception   | 21                             | 1 <sup>o</sup> | 325                                             | A                    | Omicron       |
| 2 <sup>o</sup>  | -                              | -              | 131                                             | A                    | Omicron       |
| Preconception   | -                              | -              | 135                                             | M                    | Omicron       |
| 3 <sup>o</sup>  | 28                             | 3 <sup>o</sup> | 3                                               | M                    | Omicron       |
| Preconception   | 344                            | 3 <sup>o</sup> | 22                                              | A                    | Omicron       |
| 3 <sup>o</sup>  | -                              | -              | 28                                              | M                    | Omicron       |
| 2 <sup>o</sup>  | 21                             | 2 <sup>o</sup> | 134                                             | A                    | Omicron       |
| Preconception*# | 92                             | Preconception  | 7                                               | A                    | Omicron       |
| Preconception   | 21                             | Preconception  | 177                                             | M                    | Omicron       |
| Preconception   | 291                            | 3 <sup>o</sup> | 41                                              | A                    | Omicron       |
| Preconception   | 21                             | Preconception  | 181                                             | M                    | Omicron       |
| 2 <sup>o</sup>  | 21                             | 2 <sup>o</sup> | 112                                             | A                    | Omicron       |
| 2 <sup>o</sup>  | 28                             | 2 <sup>o</sup> | 104                                             | A                    | Omicron       |
| 2 <sup>o</sup>  | 21                             | 2 <sup>o</sup> | 120                                             | M                    | Omicron       |
| Preconception   | 21                             | Preconception  | 195                                             | M                    | Omicron       |
| 2 <sup>o</sup>  | 21                             | 2 <sup>o</sup> | 96                                              | A                    | Omicron       |
| Preconception*  | -                              | -              | 354                                             | A                    | Omicron       |
| 2 <sup>o</sup>  | 21                             | 2 <sup>o</sup> | 103                                             | A                    | Omicron       |
| 1 <sup>o</sup>  | 21                             | 1 <sup>o</sup> | 195                                             | A                    | Omicron       |

**Supplementary Table S1:** Temporal trends in COVID-19 vaccine in our 27 vaccinated women. Description of vaccination received by study subjects, the number of doses, the interval between dose, and timing between last dose and SARS-CoV-2 diagnosis. SYN, symptoms of SARS-CoV-2 infection; S, severe; M, mild; A, asymptomatic. PS, Predominant strain (in Aragón) at the moment of SARS-CoV-2 diagnosis. All subjects received mRNA-based vaccines except for study subjects marked\*, who received Viral vector-based vaccines. Only the subject marked # received a third dose: 290 days after the first dose, during the 2<sup>o</sup> trimester of pregnancy mRNA.
